# Supplementary material for: Newborn hearing screening programme in Belgium: a consensus recommendation on risk factors
Source: Springer Nature journal article supplement (doi:10.1186/s12887-015-0479-4), 2015-10-16
Supplement: MOESM1 [file 9747146]

Additional file

Table 1: Rating of the quality of evidence for the risk factors for hearing loss

|                                | <b>Study limitations</b>         | <b>Inconsistent results</b> | <b>Indirectness of evidence</b>   | <b>Imprecision</b>     | <b>Publication bias</b> | <b>Upgrading</b>                                        | <b>Quality of evidence</b> |
|--------------------------------|----------------------------------|-----------------------------|-----------------------------------|------------------------|-------------------------|---------------------------------------------------------|----------------------------|
| Congenital cytomegalovirus     | No serious limitations           | No serious inconsistency    | No serious indirectness           | No serious imprecision | Undetected              | Natural history known                                   | High <sup>1</sup>          |
| Congenital toxoplasmosis       | No serious limitations           | No serious inconsistency    | No serious indirectness           | No serious imprecision | Undetected              | Natural history known                                   | High                       |
| Congenital syphilis            | No serious limitations           | No serious inconsistency    | No serious indirectness           | No serious imprecision | Undetected              | Natural history known <sup>2</sup>                      | High                       |
| Congenital rubella             | No serious limitations           | No serious inconsistency    | No serious indirectness           | No serious imprecision | Undetected              | Natural history known; epidemiol. relation <sup>3</sup> | High                       |
| Congenital herpes              | Serious limitations              | Serious inconsistency       | No serious indirectness           | Serious imprecision    | Undetected              |                                                         | Very low <sup>4</sup>      |
| Family history of hearing loss | Serious limitations <sup>5</sup> | No serious inconsistency    | Serious indirectness <sup>6</sup> | No serious imprecision | Undetected              | Knowledge in genetics                                   | Moderate <sup>7</sup>      |
| Consanguinity                  | Serious limitations <sup>5</sup> | No serious inconsistency    | Serious indirectness <sup>6</sup> | No serious imprecision | Undetected              | Knowledge in genetics                                   | Moderate <sup>7</sup>      |

|                                                          |                        |                                     |                         |                        |            |                                      |                        |
|----------------------------------------------------------|------------------------|-------------------------------------|-------------------------|------------------------|------------|--------------------------------------|------------------------|
| Malformations and syndromes associated with hearing loss | No serious limitations | No serious inconsistency            | No serious indirectness | No serious imprecision | Undetected | Knowledge in genetics                | High <sup>7</sup>      |
| Malformations of the pinnae (isolated)                   | No serious limitations | Serious inconsistency               | No serious indirectness | No serious imprecision | Undetected |                                      | Low <sup>8</sup>       |
| Maternal intoxication: foetal alcohol syndrome           | No serious limitations | No serious inconsistency            | No serious indirectness | No serious imprecision | Undetected | Very high prevalence of hearing loss | Moderate               |
| Maternal intoxication: drug abuse                        | Serious limitations    | Very serious inconsistency          | No serious indirectness | No serious imprecision | Undetected |                                      | Very low               |
| Very low birth weight                                    | Serious limitations    | No serious inconsistency            | Serious indirectness    | No serious imprecision | Undetected |                                      | Very low <sup>9</sup>  |
| Birth asphyxia/Apgar score                               | No serious limitations | Serious inconsistency <sup>10</sup> | No serious indirectness | No serious imprecision | Undetected |                                      | Low                    |
| Hyperbilirubinaemia                                      | No serious limitations | No serious inconsistency            | No serious indirectness | No serious imprecision | Undetected | High prevalence of hearing loss      | Moderate <sup>11</sup> |
| Neonatal intensive care unit (NICU) stay                 | Serious limitations    | Serious inconsistency               | Serious indirectness    | No serious imprecision | Undetected |                                      | Very low <sup>12</sup> |
| Assisted ventilation                                     | Serious limitations    | Serious inconsistency               | No serious indirectness | No serious imprecision | Undetected |                                      | Very low               |

|                                                                                                                            |                        |                          |                         |                        |            |                                               |                        |
|----------------------------------------------------------------------------------------------------------------------------|------------------------|--------------------------|-------------------------|------------------------|------------|-----------------------------------------------|------------------------|
| Ototoxic drugs: aminoglycosides                                                                                            | No serious limitations | Serious inconsistency    | No serious indirectness | No serious imprecision | Undetected |                                               | Very low <sup>13</sup> |
| Ototoxic drugs: loop diuretics                                                                                             | No serious limitations | Serious inconsistency    | No serious indirectness | No serious imprecision | Undetected |                                               | Very low <sup>13</sup> |
| Extracorporeal membrane oxygenation (ECMO)                                                                                 | Serious limitations    | No serious inconsistency | No serious indirectness | No serious imprecision | Undetected | High prevalence of sensorineural hearing loss | Moderate               |
| Congenital diaphragmatic hernia                                                                                            | Serious limitations    | Serious inconsistency    | No serious indirectness | No serious imprecision | Undetected |                                               | Very low               |
| Inhaled nitric oxide                                                                                                       | No serious limitations | No serious inconsistency | No serious indirectness | No serious imprecision | Undetected |                                               | Very low <sup>14</sup> |
| Neurologic disease: meningitis                                                                                             | No serious limitations | No serious inconsistency | No serious indirectness | No serious imprecision | Undetected | High prevalence of sensorineural hearing loss | Moderate               |
| Neurologic disease: intraventricular haemorrhage                                                                           | No serious limitations | No serious inconsistency | Serious indirectness    | No serious imprecision | Undetected |                                               | Very low <sup>15</sup> |
| Congenital hypothyroidism                                                                                                  | No serious limitations | No serious inconsistency | No serious indirectness | No serious imprecision | Undetected | Population-based study                        | Moderate               |
| <sup>1</sup> Epidemiological evidence for the risk factor for hearing loss based on rigorous observational studies/reviews |                        |                          |                         |                        |            |                                               |                        |
| <sup>2</sup> Particularly late-onset hearing loss in the absence of treatment                                              |                        |                          |                         |                        |            |                                               |                        |

|                                                                                                                                                                                                                                                                                      |
|--------------------------------------------------------------------------------------------------------------------------------------------------------------------------------------------------------------------------------------------------------------------------------------|
| <sup>3</sup> Evidence of a relationship between rubella and neonatal hearing impairment due to vaccination                                                                                                                                                                           |
| <sup>4</sup> Few studies with strong methodology (e.g. lack of obvious information on follow-up, other risk factors not investigated, etc.); mostly case series; few patients/events                                                                                                 |
| <sup>5</sup> Study limitations such as inaccurate information about outcome measures, absence of control group, and absence of information about other risk factors for hearing loss                                                                                                 |
| <sup>6</sup> In most studies, confusion between the risk factors 'family history' and 'consanguinity'                                                                                                                                                                                |
| <sup>7</sup> Owing to the high level of knowledge of genetics explaining hereditary hearing loss                                                                                                                                                                                     |
| <sup>8</sup> Despite inconsistencies among studies (few cases); one large population-based study with strong methodology                                                                                                                                                             |
| <sup>9</sup> Study limitations such as failure to account for confounding factors, inappropriate control group, and limited evidence of a direct relation between the risk factor and hearing loss                                                                                   |
| <sup>10</sup> Different cut-offs for birth asphyxia (i.e. level and timing of Apgar score) led to inconsistencies, but Apgar score at 5 minutes appears to be a good risk factor                                                                                                     |
| <sup>11</sup> Sensitivity of the auditory system to bilirubin toxicity                                                                                                                                                                                                               |
| <sup>12</sup> Methodological weaknesses such as problems in the selection of controls or sample size, confounding factors not adequately taken into account, choice of statistical analysis (i.e. univariate vs. multivariable analysis), NICU factor reflecting multiple dimensions |
| <sup>13</sup> In the context of appropriate administration of ototoxic treatments (except in cases of genetic mutation that increase susceptibility to aminoglycoside-induced hearing loss)                                                                                          |
| <sup>14</sup> No differences in incidence of hearing loss between groups treated with inhaled nitric oxide and oxygen                                                                                                                                                                |
| <sup>15</sup> Question of the role of white matter lesions over intraventricular haemorrhage on hearing loss                                                                                                                                                                         |
